# Supplementary material for: Activation of the TGF-β Pathway Enhances the Efficacy of Platinum-Based Chemotherapy in Small Cell Lung Cancer Patients
Source: Hindawi journal article supplement (doi:10.1155/2022/8766448), 2022-12-21
Supplement: f1 [file 8766448.f1.pdf]

**Supplementary TABLE 1. List of genes contained in the transforming growth factor  $\beta$  signaling pathway for analysis.**

|          |
|----------|
| TGFB1    |
| TGFBR1   |
| TGFBR2   |
| ARHGEF18 |
| CGN      |
| F11R     |
| FKBP1A   |
| PARD3    |
| PARD6A   |
| PRKCZ    |
| RHOA     |
| RPS27A   |
| SMURF1   |
| UBA52    |
| UBB      |
| UBC      |
