# Supplementary material for: Activation of the TGF-β Pathway Enhances the Efficacy of Platinum-Based Chemotherapy in Small Cell Lung Cancer Patients
Source: Hindawi journal article supplement (doi:10.1155/2022/8766448), 2022-12-21
Supplement: f2 [file 8766448.f2.pdf]

**Supplementary TABLE 2** Clinical demographics of SCLC patients in the Local-SCLC cohort in the TGFB-HIGH and TGFB-LOW groups.

|                  | <b>TGFB-HIGH(N=22)</b> | <b>TGFB-LOW(N=23)</b> | <b>Overall (N=45)</b> | <b>P value</b> |
|------------------|------------------------|-----------------------|-----------------------|----------------|
| <b>Gender</b>    |                        |                       |                       | 0.4591         |
| Female           | 5(22.7%)               | 3(13.0%)              | 8(17.8%)              |                |
| Male             | 17(77.3%)              | 20(87.0%)             | 37(82.2%)             |                |
| <b>Smoking</b>   |                        |                       |                       | 0.0689         |
| Non-Smoker       | 8(36.4%)               | 2(8.7%)               | 10(22.2%)             |                |
| Smoker           | 14(63.6%)              | 20(87.0%)             | 34(75.6%)             |                |
| Missing          | 0(0%)                  | 1(4.3%)               | 1(2.2%)               |                |
| <b>Drinking</b>  |                        |                       |                       | 0.7626         |
| Drinker          | 11(50.0%)              | 13(56.5%)             | 24(53.3%)             |                |
| Non-Drinker      | 11(50.0%)              | 9(39.1%)              | 20(44.4%)             |                |
| Missing          | 0(0%)                  | 1(4.3%)               | 1(2.2%)               |                |
| <b>TMB</b>       |                        |                       |                       | 0.7106         |
| Mean (SD)        | 57.4(55.9)             | 40.4(33.3)            | 48.7(46.0)            |                |
| Median [Min,Max] | 30.9[2.82,192]         | 30.4[9.92,165]        | 30.4[2.82,192]        |                |
