# Supplementary material for: Activation of the TGF-β Pathway Enhances the Efficacy of Platinum-Based Chemotherapy in Small Cell Lung Cancer Patients
Source: Hindawi journal article supplement (doi:10.1155/2022/8766448), 2022-12-21
Supplement: f3 [file 8766448.f3.pdf]

**Supplementary TABLE 3** Clinical demographics of SCLC patients in the George-SCLC cohort in the TGFB-HIGH and TGFB-LOW groups.

|                   | <b>TGFB-HIGH(N=34)</b> | <b>TGFB-LOW(N=34)</b> | <b>Overall(N=68)</b> | <b>P value</b> |
|-------------------|------------------------|-----------------------|----------------------|----------------|
| <b>TNM stage</b>  |                        |                       |                      | 0.3454         |
| I                 | 12(35.3%)              | 15(44.1%)             | 27(39.7%)            |                |
| II                | 10(29.4%)              | 4(11.8%)              | 14(20.6%)            |                |
| III               | 9(26.5%)               | 10(29.4%)             | 19(27.9%)            |                |
| IV                | 3(8.8%)                | 5(14.7%)              | 8(11.8%)             |                |
| <b>Age</b>        |                        |                       |                      | 0.4500         |
| Mean (SD)         | 64.9(8.54)             | 64.1(9.31)            | 64.5(8.87)           |                |
| Median [Min, Max] | 65.5[47.0,83.0]        | 62.5[47.0,83.0]       | 64.0[47.0,83.0]      |                |
| <b>Pack-Years</b> |                        |                       |                      | 0.6462         |
| Mean (SD)         | 45.7(27.5)             | 43.1(23.9)            | 44.4(25.5)           |                |
| Median [Min,Max]  | 50.0[0,100]            | 40.0[0.750,90.0]      | 45.0[0,100]          |                |
| Missing           | 10(29.4%)              | 11(32.4%)             | 21(30.9%)            |                |
