# Supplementary material for: Activation of the TGF-β Pathway Enhances the Efficacy of Platinum-Based Chemotherapy in Small Cell Lung Cancer Patients
Source: Hindawi journal article supplement (doi:10.1155/2022/8766448), 2022-12-21
Supplement: f4 [file 8766448.f4.pdf]

**Supplementary TABLE 4:** Univariate COX regression analysis of genes within the TGFB pathway in both in both cohorts.

| Gene            | Local-SCLC |           |          | George-SCLC |           |          |
|-----------------|------------|-----------|----------|-------------|-----------|----------|
|                 | HR         | 95%CI     | pvalue   | HR          | 95%CI     | pvalue   |
| <b>TGFBR2</b>   | 0.080023   | 0.02-0.36 | 0.000992 | 1.090708    | 0.59-2.02 | 0.783032 |
| <b>TGFB1</b>    | 0.111157   | 0.03-0.49 | 0.003669 | 0.725363    | 0.39-1.34 | 0.307455 |
| <b>SMURF1</b>   | 0.151632   | 0.05-0.48 | 0.001293 | 0.649213    | 0.35-1.21 | 0.175586 |
| <b>PRKCZ</b>    | 0.197115   | 0.06-0.61 | 0.004775 | 0.629353    | 0.34-1.17 | 0.142656 |
| <b>RPS27A</b>   | 0.22354    | 0.08-0.66 | 0.006313 | 0.853177    | 0.46-1.59 | 0.618443 |
| <b>UBA52</b>    | 0.295861   | 0.11-0.82 | 0.018674 | 1.14953     | 0.62-2.13 | 0.657644 |
| <b>TGFBR1</b>   | 0.300096   | 0.11-0.85 | 0.023744 | 0.83349     | 0.45-1.54 | 0.562009 |
| <b>RHOA</b>     | 0.351258   | 0.13-0.97 | 0.044179 | 1.177611    | 0.64-2.18 | 0.603197 |
| <b>FKBP1A</b>   | 0.359114   | 0.13-1    | 0.049219 | 2.300245    | 1.19-4.44 | 0.013137 |
| <b>F11R</b>     | 0.384509   | 0.14-1.04 | 0.058533 | 1.118657    | 0.61-2.07 | 0.720606 |
| <b>UBC</b>      | 0.418293   | 0.15-1.17 | 0.096284 | 1.042809    | 0.56-1.94 | 0.894791 |
| <b>PARD6A</b>   | 0.443732   | 0.17-1.17 | 0.100128 | 0.985119    | 0.53-1.83 | 0.962012 |
| <b>ARHGEF18</b> | 0.446151   | 0.17-1.19 | 0.107546 | 0.301425    | 0.15-0.6  | 0.000557 |
| <b>CGN</b>      | 0.545439   | 0.21-1.41 | 0.210962 | 0.774417    | 0.42-1.43 | 0.41569  |
| <b>UBB</b>      | 0.643221   | 0.25-1.66 | 0.363088 | 1.013048    | 0.55-1.8  | 0.967038 |
| <b>PARD3</b>    | 1.074953   | 0.43-2.71 | 0.878393 | 0.60044     | 0.26-1.36 | 0.222132 |
