# Supplementary material for: Activation of the TGF-β Pathway Enhances the Efficacy of Platinum-Based Chemotherapy in Small Cell Lung Cancer Patients
Source: Hindawi journal article supplement (doi:10.1155/2022/8766448), 2022-12-21
Supplement: f6 [file 8766448.f6.pdf]

Estimated IC50 of Cisplatin (Geroge-SCLC)

$2.882e-02$

7  
6  
5  
4  
3  
2

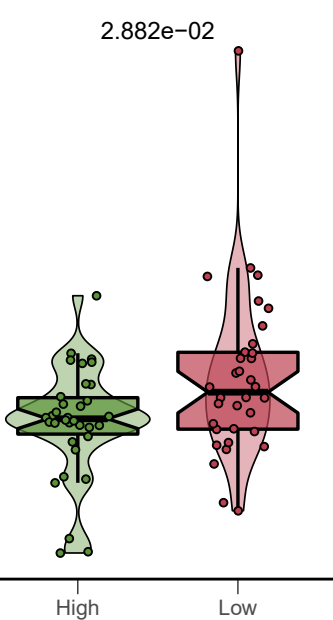

High

Low
