# Supplementary material for: Activation of the TGF-β Pathway Enhances the Efficacy of Platinum-Based Chemotherapy in Small Cell Lung Cancer Patients
Source: Hindawi journal article supplement (doi:10.1155/2022/8766448), 2022-12-21

**A** TGFB Pathway  
High versus Low  
Local-SCLC

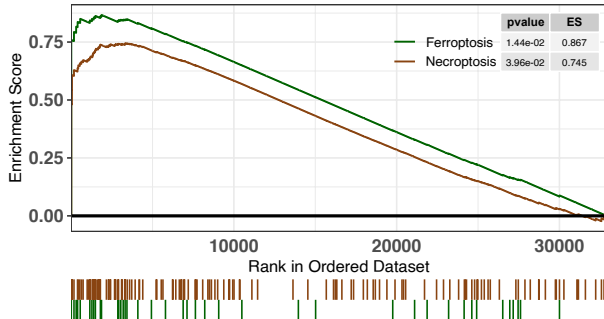

**B** TGFB Pathway  
High versus Low  
Local-SCLC

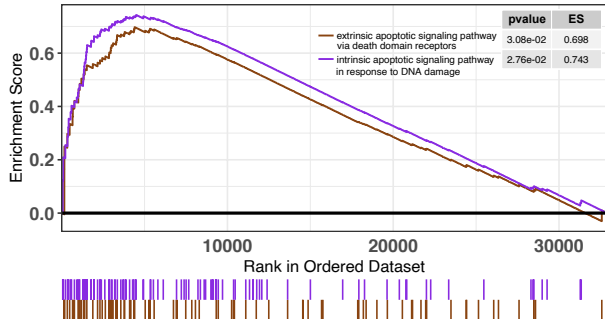

Supplement: f9 [file 8766448.f9.pdf]
